# Supplementary material
Source: MDPI journal article supplement (https://www.mdpi.com/search?q=molecules-23-03277)
Supplement: s001 [file molecules-23-03277-s001.pdf]

## Supplementary Materials

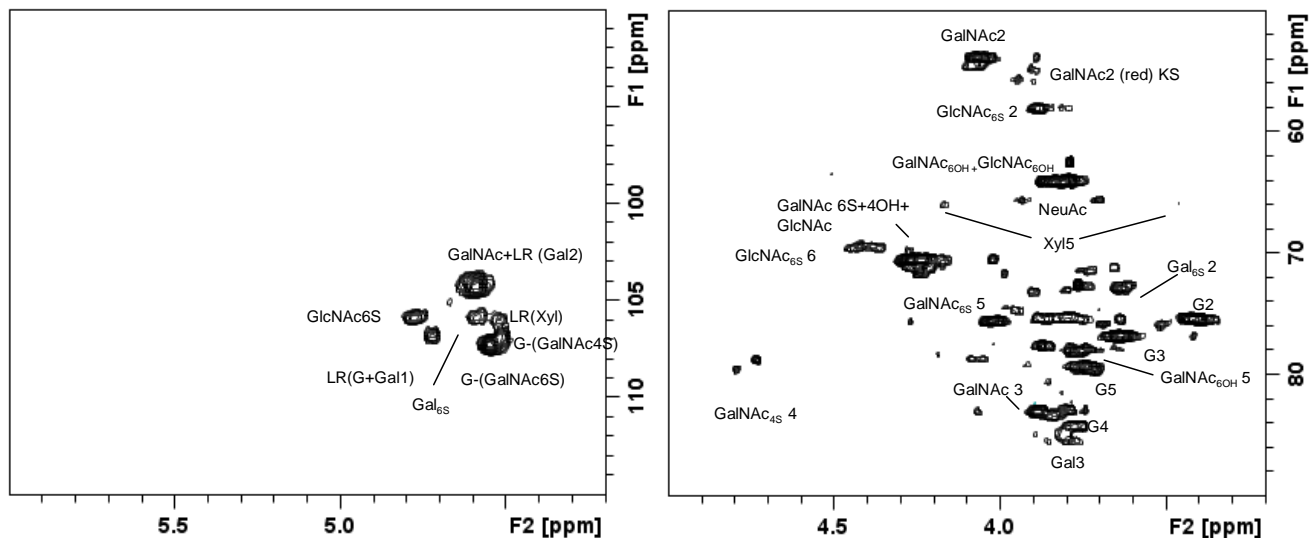

**FIGURE S1. HSQC-NMR spectrum of GAGs from Aggrecan.** Signals of the anomeric region are shown on the left while signals from the backbone are shown on the right. GalNAc: N-acetyl galactosamine, GlcNAc: N-acetylglucosamine, G: glucuronic acid, Gal: galactose, NeuAc: neuraminic acid, Xyl: xylose. CSs are constituted by GalNAc and G, while type II KS is constituted by Gal and GlcNAc units with NeuAc residues at the non-reducing end and GalNAc at the reducing end.

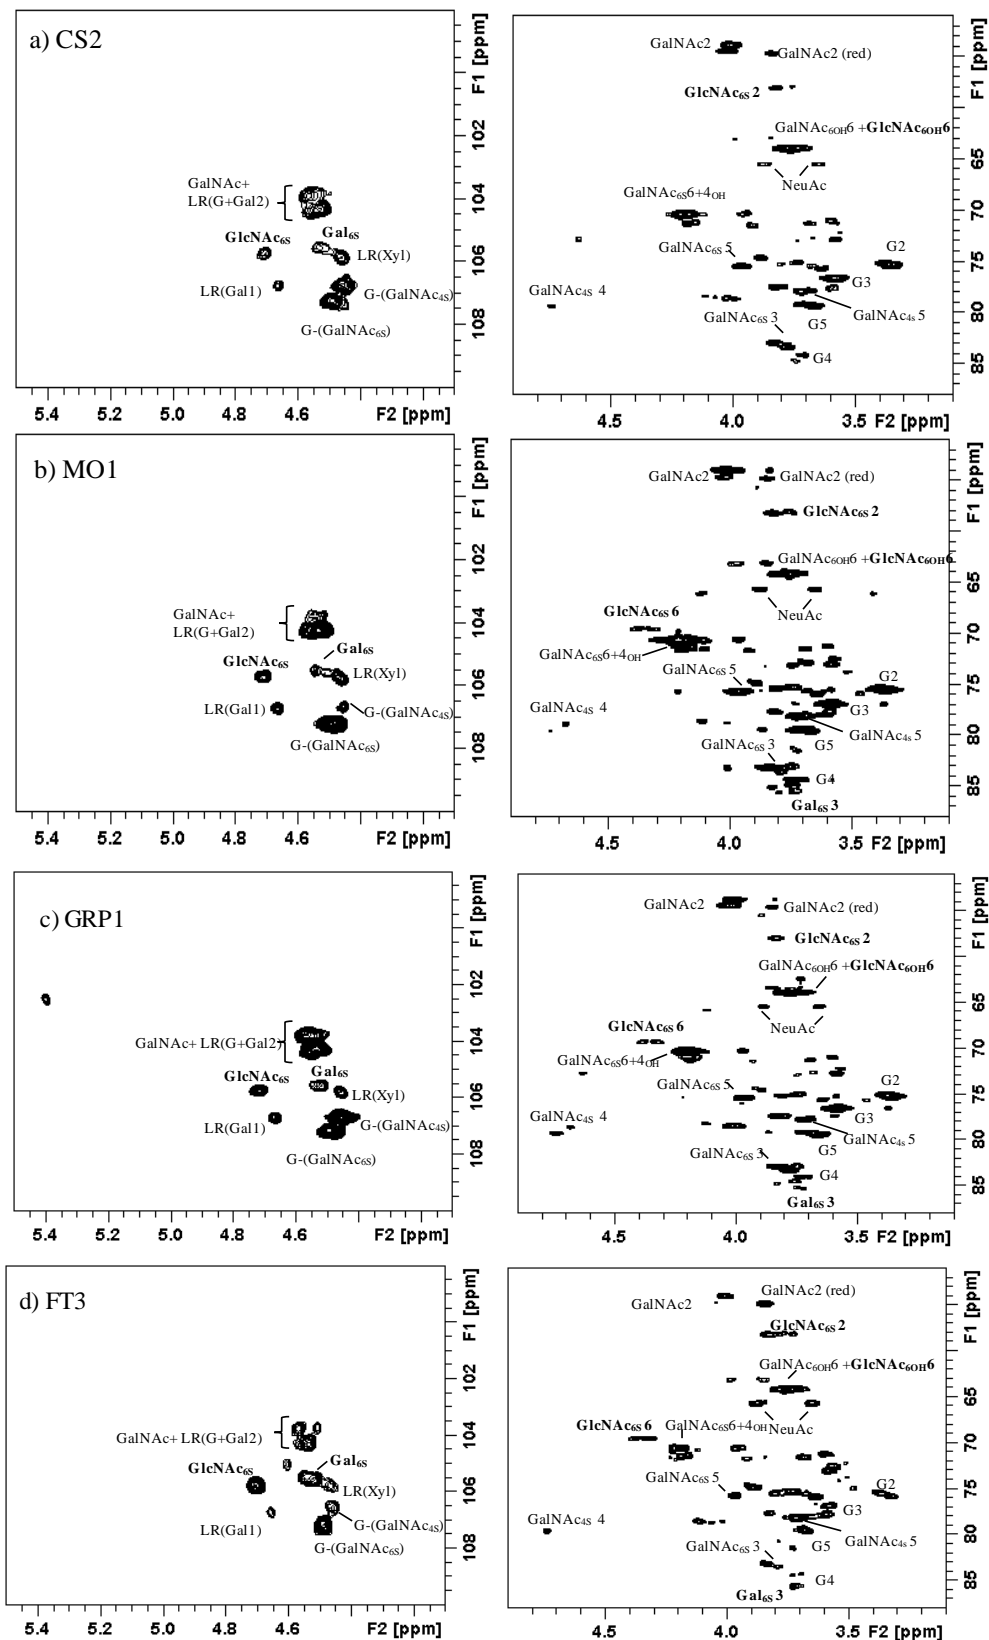

FIGURE S2. HSQC-NMR spectra of GAGs from cartilage: a) CS2, b) MO1, c) GRP1, d) FT3. Signals of the anomeric region are shown on the left while signals from the backbone are shown on the right. GalNAc: N-acetyl galactosamine, GlcNAc: N-acetyl-glucosamine, G: glucuronic acid, Gal: galactose, NeuAc: neuraminic acid, Xyl: xylose, LR: linkage region. Signal from KS are indicated in bold.

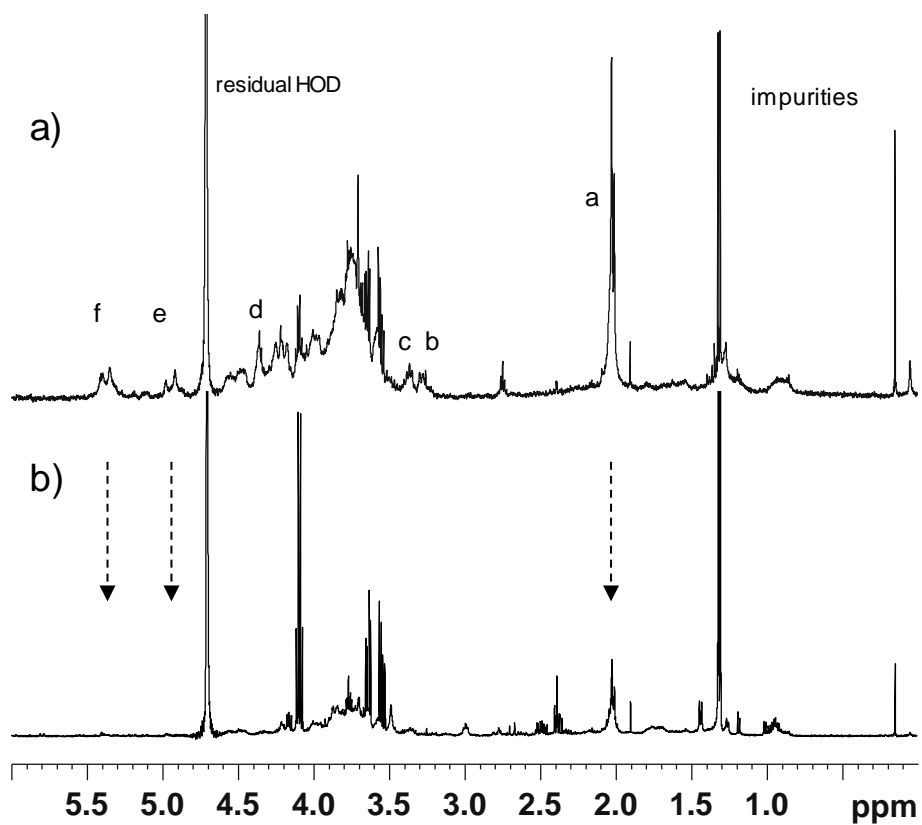

**FIGURE S3.** 1D-NMR spectra of CS5-B (< 10kDa) before, a) and after, b) digestion with heparinases. Signals of HS are indicated and correspond to: a. N-acetyl (CH<sub>3</sub>) GlcNAc (2.0 ppm); b. GlcNS, H-2 (3.2 ppm); c. GlcA, H-2 (3.4 ppm); e. IdoA, H-5 (4.9-5 ppm); f. GlcN (Ac or S) and IdoA2S H-1 (5.4 ppm). Arrows indicate the decrease of signals.

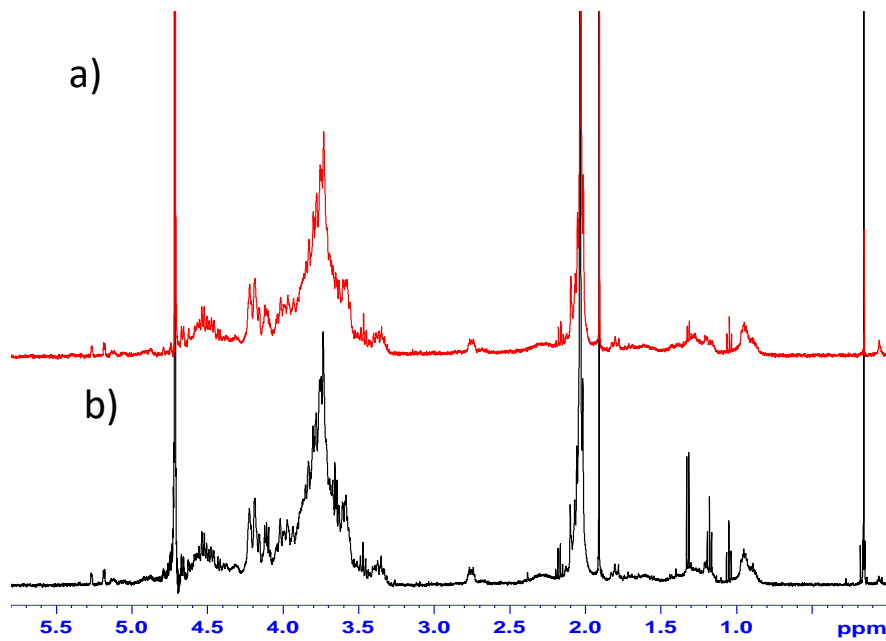

FIGURE S4. 1D-NMR spectra of GRP2-B before, a) and after, b) digestion with heparinases. No structural changes can be observed.

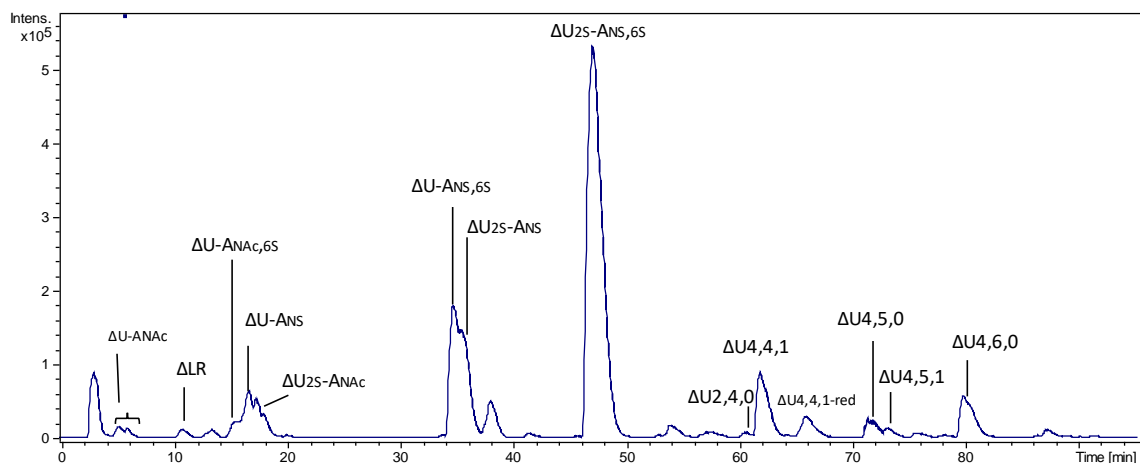

FIGURE S5. LC-MS profile of commercial porcine heparin digested with heparinases I, II, III mixture: structure assignment of the main peaks.

**TABLE S1. Experimental data obtained by MS/MS fragmentation of the ion at m/z 774.148, attributed to  $\Delta U_{4,2,2}$ -LR. The selected ion was fragmented with a collision energy of 50 eV and obtained ions are reported.**

| Experimental<br>m/z | z  | Mass<br>assignment                      | Theoretical<br>m/z | Error<br>(ppm) |
|---------------------|----|-----------------------------------------|--------------------|----------------|
| 157.0135            | -1 | $\Delta U$ (-H <sub>2</sub> O)          | 157.0132           | 1.9            |
| 161.0452            | -1 | Gal (-H <sub>2</sub> O)                 | 161.0445           | 4.3            |
| 175.0244            | -1 | $\Delta U$                              | 175.0237           | 4.0            |
| 193.0347            | -1 | U                                       | 193.0343           | 2.1            |
| 282.0294            | -1 | A <sub>NAc,6S</sub> (-H <sub>2</sub> O) | 282.0278           | 5.7            |
| 300.0392            | -1 | A <sub>NAc,6S</sub>                     | 300.0384           | 2.7            |
| 316.5431            | -2 | $\Delta U_{3,1,1}$                      | 316.5418           | 4.1            |
| 337.0758            | -1 | $\Delta U$ -Gal                         | 337.0765           | 2.1            |
| 378.1050            | -2 | $\Delta U_{2,0,1}$                      | 378.1031           | 5.0            |
| 396.1150            | -1 | U <sub>2,0,1</sub>                      | 396.1137           | 3.3            |
| 458.0606            | -2 | $\Delta U_{2,1,1}$                      | 458.0599           | 1.5            |
| 536.1259            | -1 | $\Delta U_{3,0,1}$ (-H <sub>2</sub> O)  | 536.1246           | 2.4            |
| 616.0816            | -1 | $\Delta U_{3,1,1}$ (-H <sub>2</sub> O)  | 616.0814           | 0.3            |
| 631.1705            | -1 | $\Delta U$ -Gal-Gal-Xyl                 | 631.1716           | 1.7            |
| 649.1818            | -1 | U-Gal-Gal-Xyl                           | 649.1822           | 0.6            |

TABLE S2. Experimental data obtained by MS/MS fragmentation of the ion at  $m/z$  546.0, attributed to  $\Delta U_{5,2,2}$ . The selected ion was fragmented with a collision energy of 50 eV and obtained ions are reported.

| Experimental<br>$m/z$ | $z$ | Mass<br>assignment                     | Theoretical<br>$m/z$ | Error<br>(ppm) |
|-----------------------|-----|----------------------------------------|----------------------|----------------|
| 157.0144              | -1  | $\Delta U$ (-H <sub>2</sub> O)         | 157.0132             | 7.6            |
| 175.0244              | -1  | $\Delta U$                             | 175.0237             | 4.0            |
| 282.0294              | -1  | $A_{NAc,6S}$ (-H <sub>2</sub> O)       | 282.0278             | 5.7            |
| 300.0378              | -1  | $A_{NAc,6S}$                           | 300.0384             | 2.0            |
| 396.1150              | -1  | U <sub>2,0,1</sub>                     | 396.1137             | 3.3            |
| 458.0606              | -2  | $\Delta U_{2,1,1}$                     | 458.0599             | 1.5            |
| 536.1187              | -1  | $\Delta U_{3,0,1}$ (-H <sub>2</sub> O) | 536.1246             | 11             |
| 554.1377              | -1  | $\Delta U_{3,0,1}$                     | 554.1363             | 2.5            |

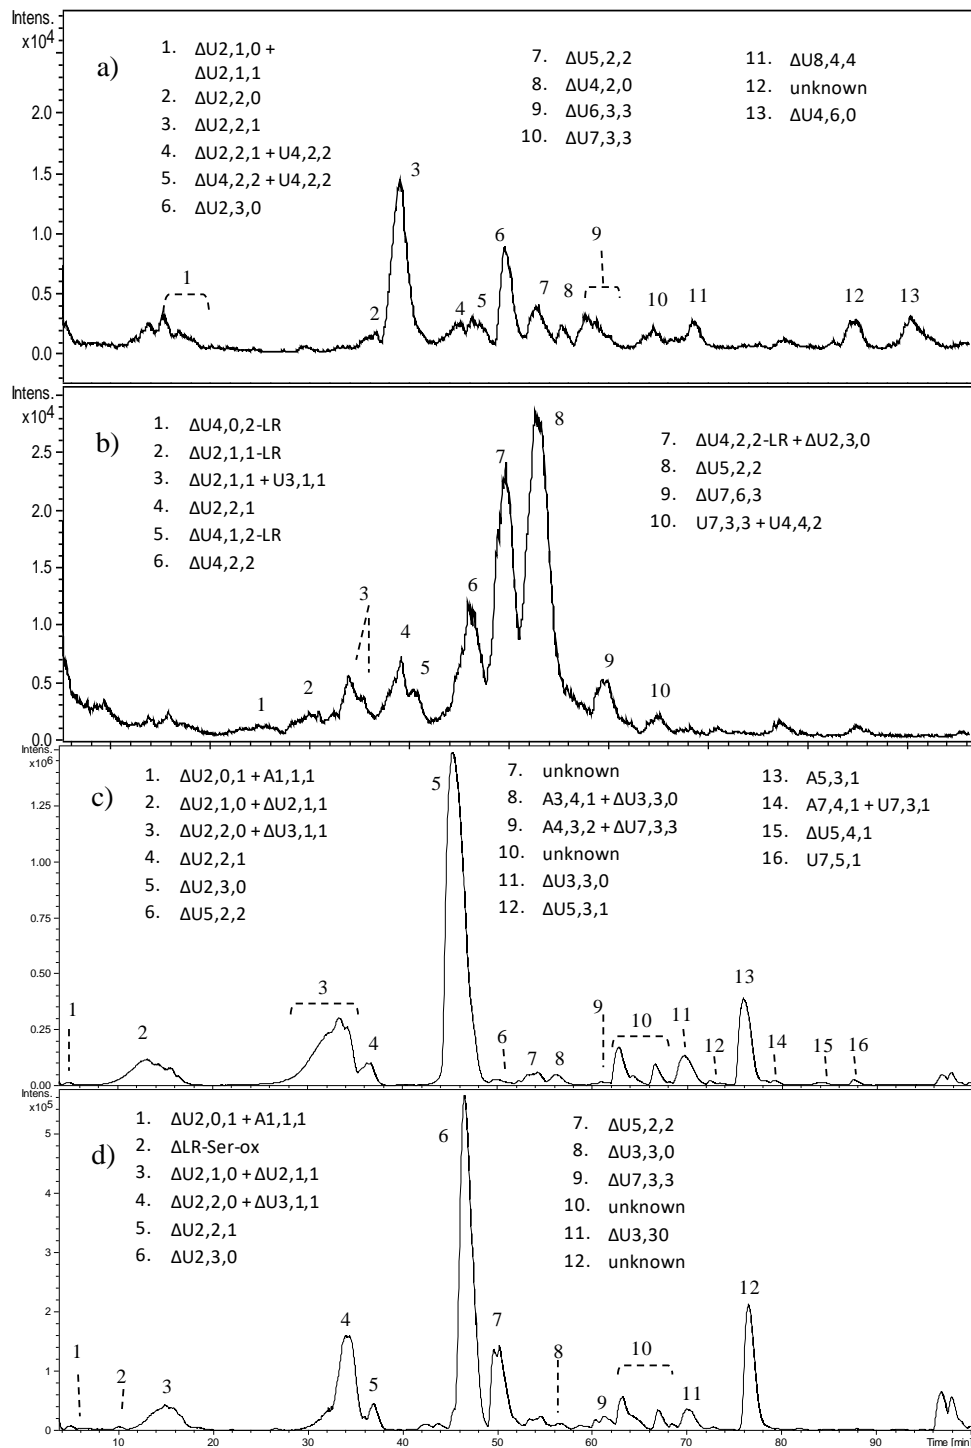

**FIGURE S6. LC-MS profiles of heparinases digestion of HS from osteochondromas.** a) OC2-A >10 kDa, b) OC2-B <10 kDa, c) OC8-A >10 kDa, d) OC8-B <10 kDa.

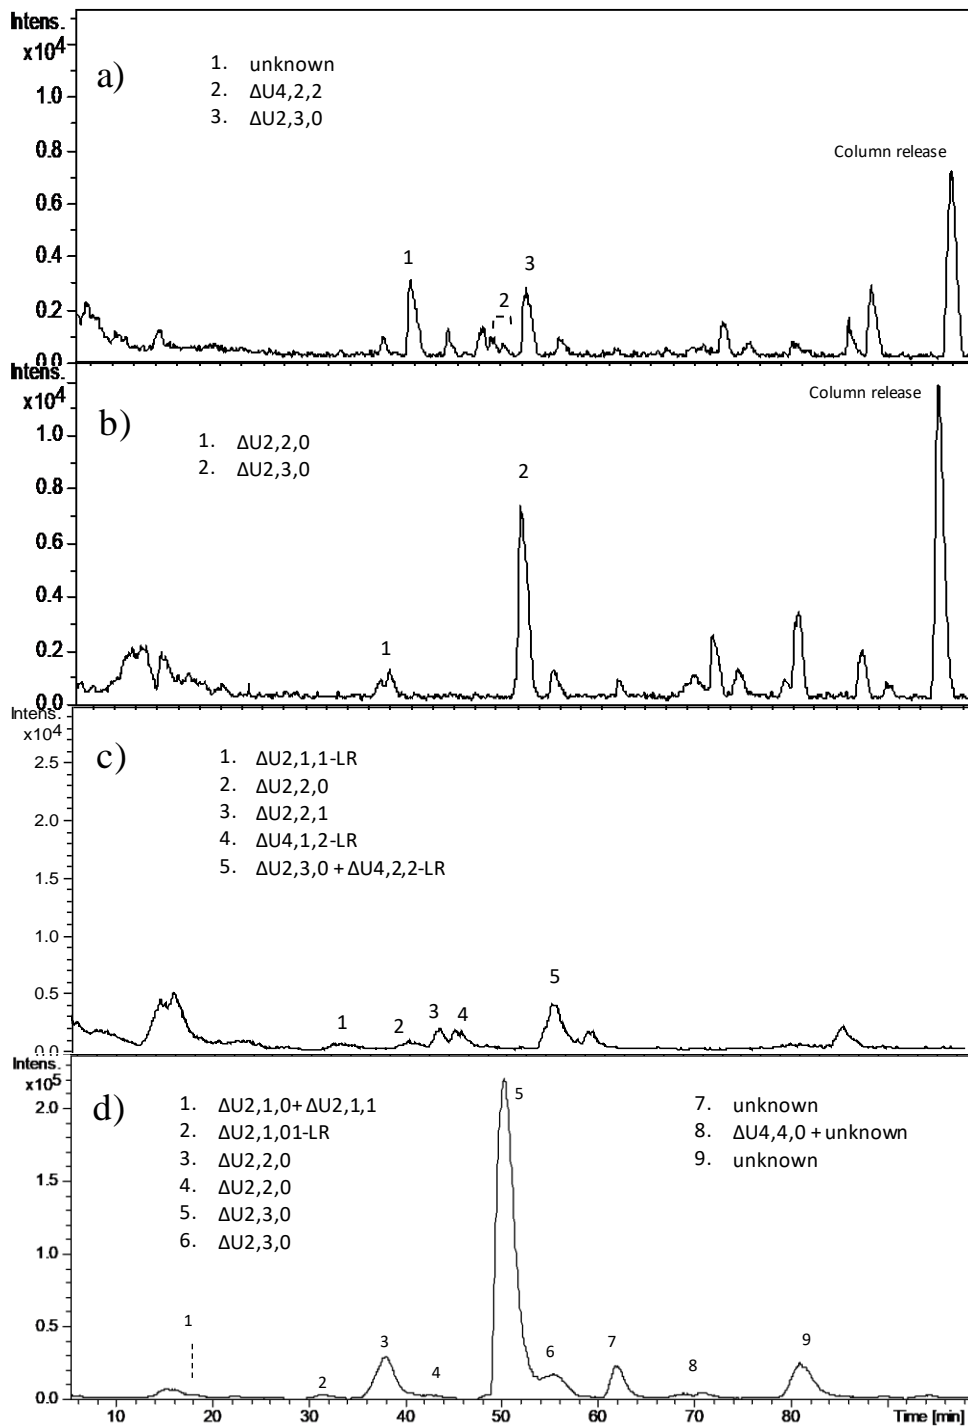

**FIGURE S7. LC-MS profiles of heparinases digestion of HS from osteochondromas. a) OC1-A >10 kDa, b) OC1-B <10 kDa, c) OC3-A >10 kDa, d) OC3-B <10 kDa.**



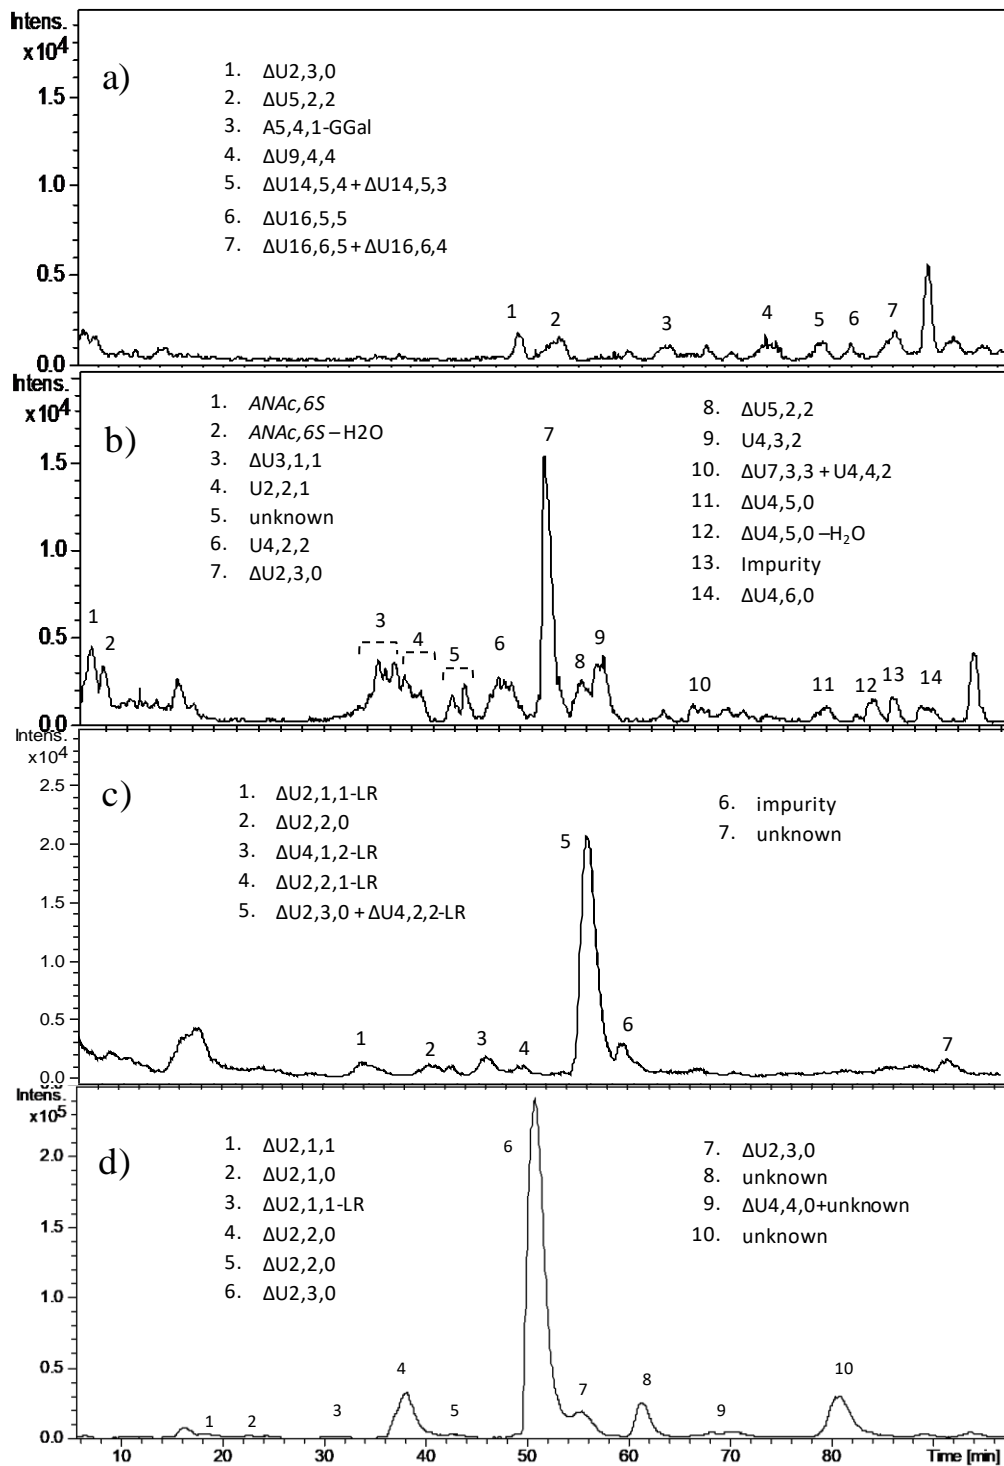

FIGURE S8. LC-MS profiles of heparinases digestion of HS from osteochondromas. a) OC6-A >10 kDa, b) OC6-B <10 kDa, c) OC7-A >10 kDa, d) OC7-B <10 kDa.

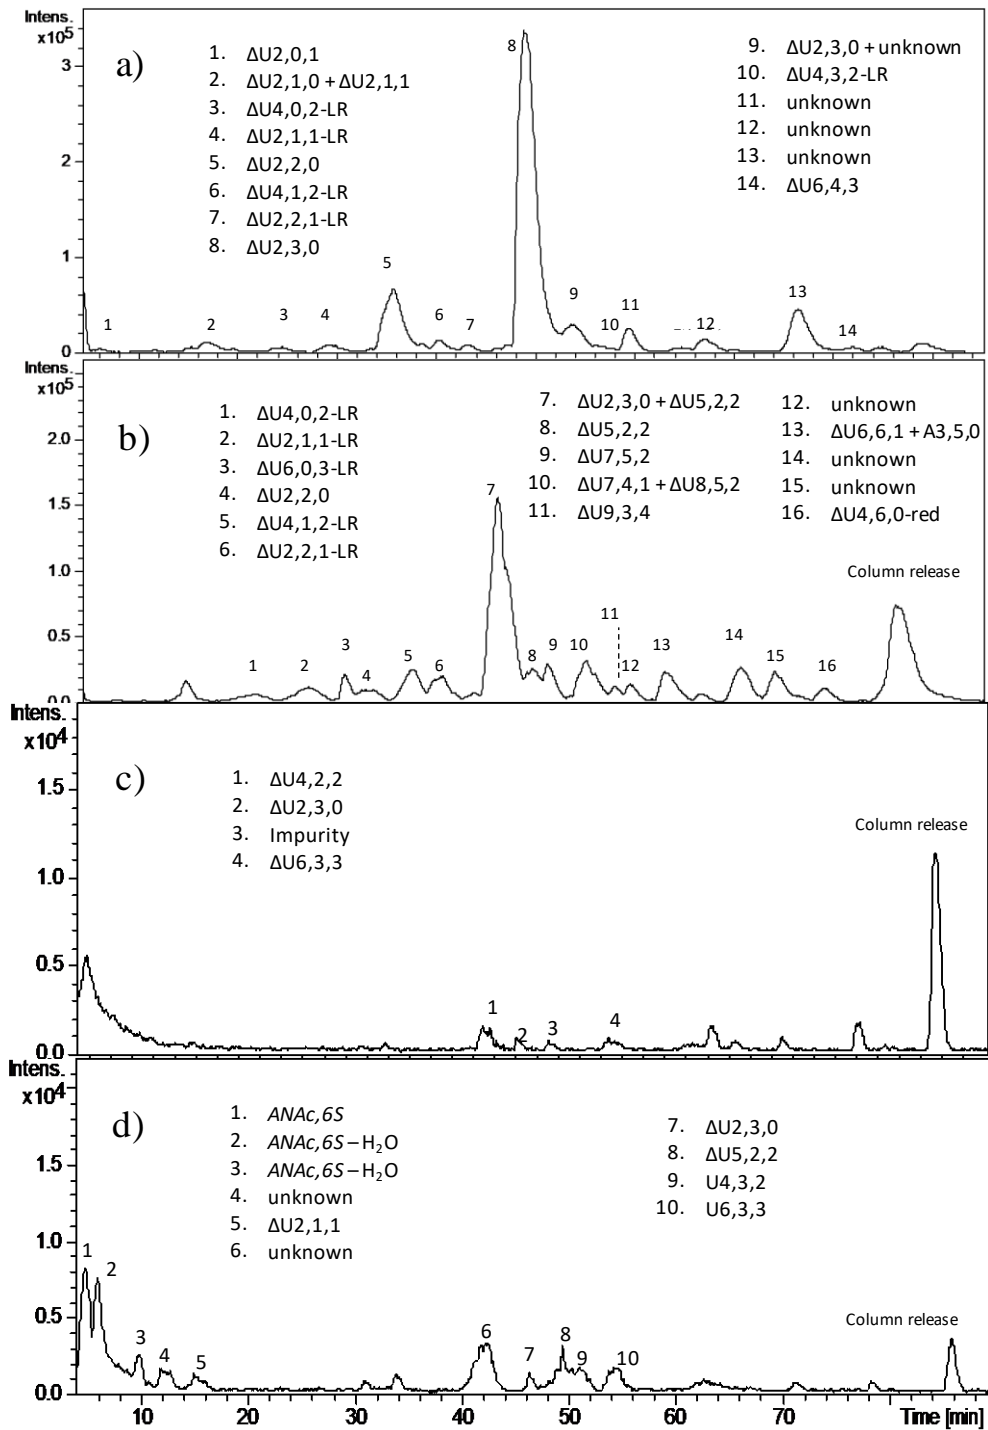

FIGURE S9. LC-MS profiles of heparinase digestion of HS from chondrosarcomas. a) CS2-A (>10 kDa) (b) CS2-B (<10 kDa), c) CS4-A (>10 kDa), d) CS4-B (<10 kDa).

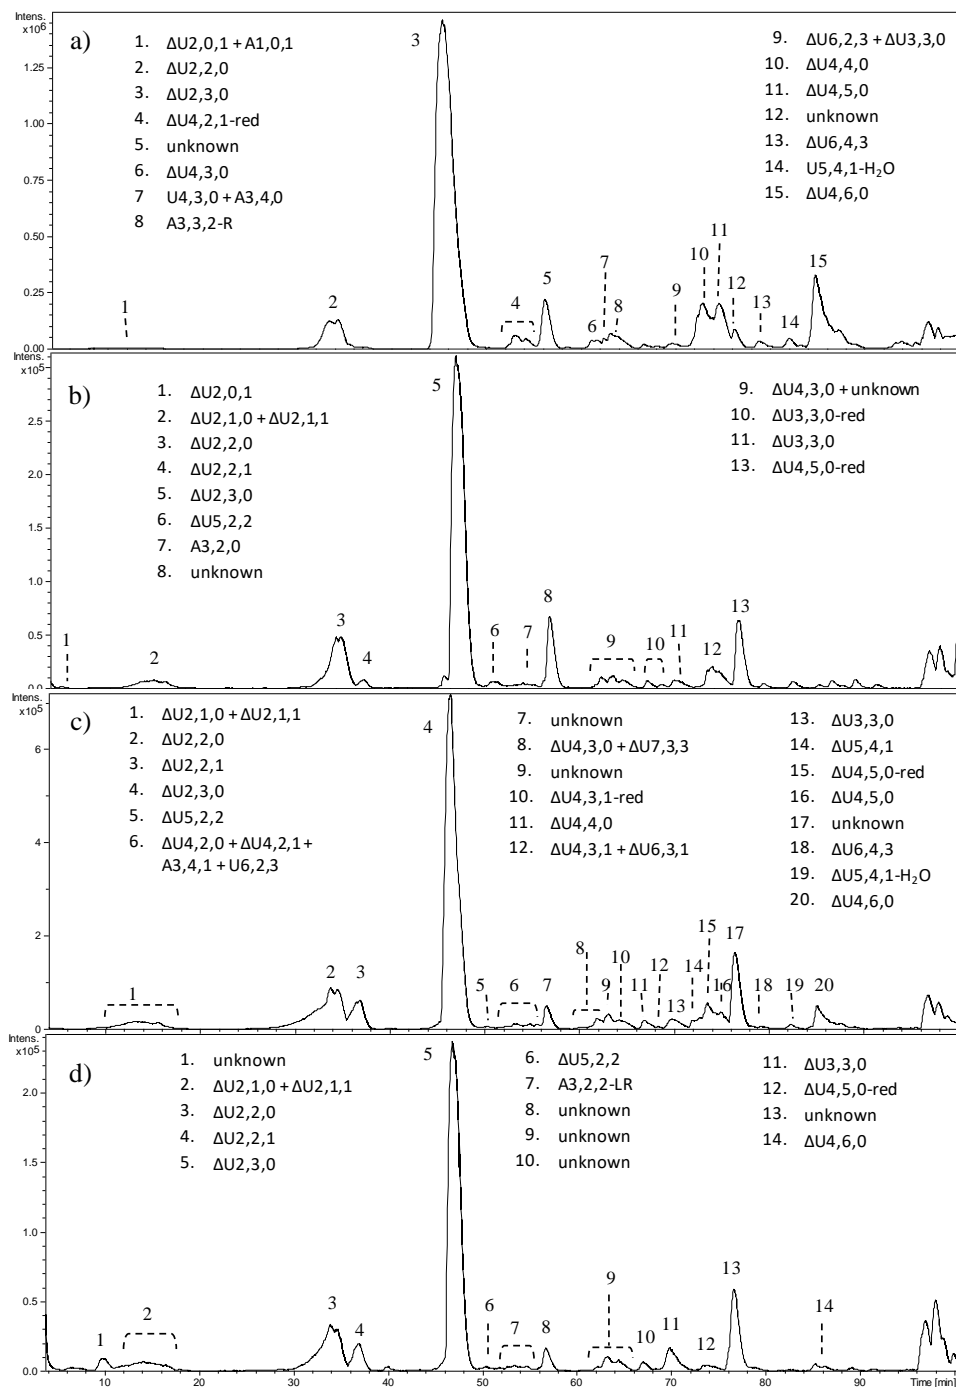

**FIGURE S10.** LC-MS profiles of heparinase digestion of HS from chondrosarcomas. a) CS5-A (>10 kDa) (b) CS5-B (<10 kDa), c) CS6-A (>10 kDa), d) CS6-B (<10 kDa).
